# Supplementary material
Source: PubMed Central journal article supplement (PMC2042199)

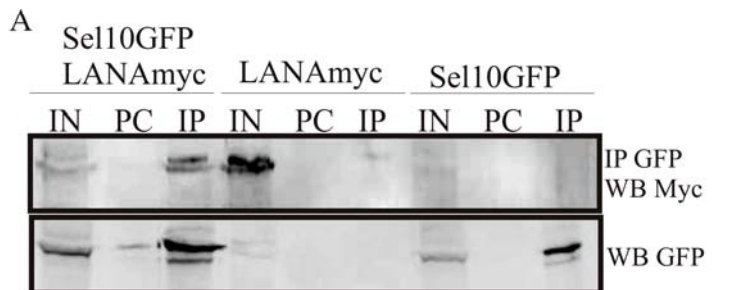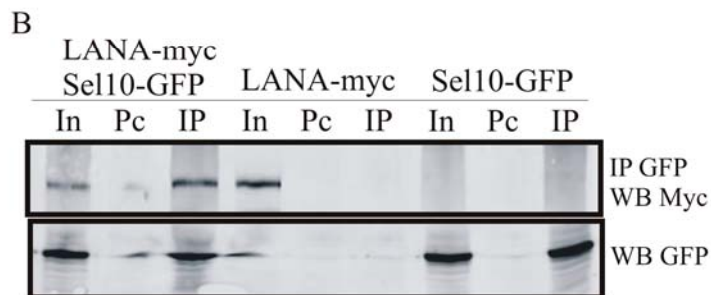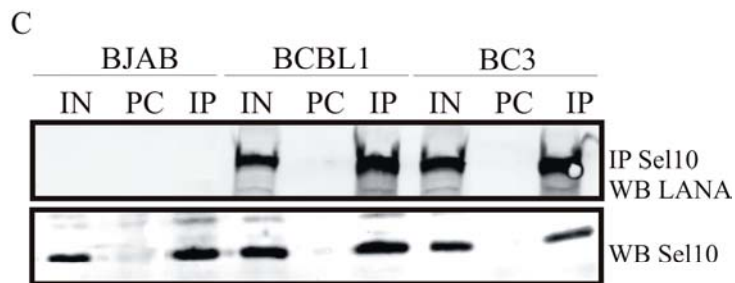

Supplement: pnas_0703508104_1.pdf [file pnas_0703508104_1.pdf]

Sel10GFP

C-LANAmyc

C-LANAmyc

Sel10GFP

IN

PC

IP

IN

PC

IP

IN

PC

IP

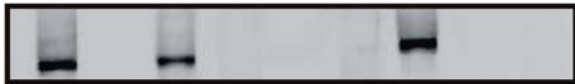

IP Myc  
WB GFP

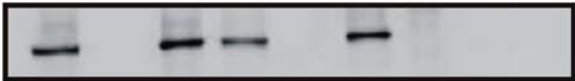

WB Myc

Supplement: pnas_0703508104_2.pdf [file pnas_0703508104_2.pdf]

**A**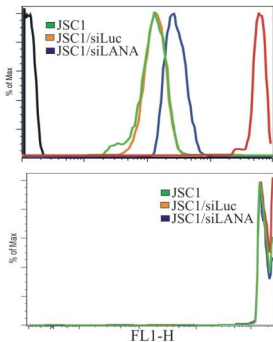**B**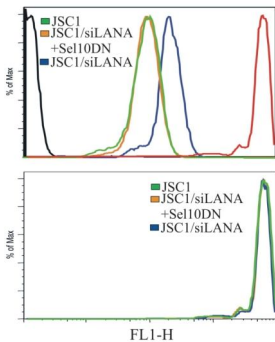

Supplement: pnas_0703508104_4.pdf [file pnas_0703508104_4.pdf]
